# Supplementary material
Source: PubMed Central journal article supplement (PMC548649)
Supplement: 7600540s1.pdf [file 7600540s1.pdf]

## Supplementary data (Yarunin et al., 2004).

**Yeast strains and plasmids.** Microbiological and recombinant DNA work were performed according to Maniatis et al., (1982). The *rix19-1* strain (*MAT $\alpha$  ura3 his3 leu2 rix19-1*) was isolated from a *ts* strains collection (Gadal et al., 2001). *RIX19*, *NBP35*, *NAR1* shuffle strains and *hcr1 $\Delta$*  strain are derivatives from the corresponding EUROSCARF (Frankfurt, Germany) diploid knockout strains (*MAT $\alpha$ / $\alpha$  his3 $\Delta$ 1/*his3 $\Delta$ 1 leu2 $\Delta$ 0/*leu2 $\Delta$ 0 lys2 $\Delta$ 0/*LYS2 ura3 $\Delta$ 0/*ura3 $\Delta$ 0*). *Tet-RLI1* and *RLI1-TAP* strains were purchased from Biocat GmbH (Heidelberg, Germany). Rli1-GFP strain was purchased from Invitrogen (Karlsruhe, Germany). Ret2-TAP strain was purchased from EUROSCARF (Frankfurt, Germany). *xpo1-1* temperature sensitive strain was obtained from the lab of Prof. Karsten Weis (Stade et al., 1997).****

Rpl25-eGFP and Rps2-eGFP reporter plasmids were described previously (Gadal et al., 2001 and Milkereit et al., 2003). Plasmid pUN100-YIL003w was generated by cloning of 1528 bp fragment, containing *YIL003w* ORF (879 bp) and both untranslated regions (app. 320 bp each) to pUN100 (Elledge and Davis, 1988) vector using Sph I and Xba I restriction sites. A synthetic lethal (*sl*) screen with *rix19-1* was performed according to Wimmer et al. (1992). Plasmid pRS315-NBP35 was generated by cloning of a 1987 bp fragment, containing the *NBP35* ORF (987 bp) and both untranslated regions (app. 500 bp each) into pRS315 (Sikorski and Hieter, 1989) vector using BamH I and Xba I restriction sites. The generation of temperature sensitive mutants was performed according to Santos-Rosa et al., (1998) using Nsi I and Spe I sites in 5' and 3' untranslated regions respectively. Plasmid pRS315-NAR1 was generated by subcloning the Xho I – Xba I fragment containing *NAR1* from the pYCG\_YNL240c plasmid (EUROSCARF) to pRS315 vector. The generation of temperature sensitive mutants was performed using Nde I and Eco 47III sites in 5' and 3' untranslated regions.

## Supplementary data references.

Elledge, S.J. and Davis, R.W. (1988) A family of versatile centromeric vectors designed for use in the sectoring-shuffle mutagenesis assay in *Saccharomyces cerevisiae*. *Gene*,

**70:** 303-12.

Gadal et al. (2001) Nuclear export of 60S ribosomal subunits depends on Xpo1p and requires a NES-containing factor Nmd3p that associates with the large subunit protein Rpl10p. *Mol. Cell. Biol.*, **21**: 3405-3415.

Hosobuchi M, Kreis T. and Schekman R. (1992) *SEC21* is a gene required for ER to Golgi protein transport that encodes a subunit of a yeast coatomer. *Nature*, **360**: 603-605.

Maniatis, T., Fritsch, E.T. and Sambrook, J. (1982) *Molecular Cloning: A Laboratory Manual*. Cold Spring Harbor Laboratory Press, Cold Spring Harbor, NY.

Milkereit et al. (2003) A Noc Complex Specifically Involved in the Formation and Nuclear Export of Ribosomal 40 S Subunits. *J. Biol. Chem.*, **278**: 4072–4081.

Sikorski, R.S. and Hieter, P. (1989) A system of shuttle vectors and yeast host strains designed for efficient manipulation of DNA in *Saccharomyces cerevisiae*. *Genetics*, **122**: 19-27.

Stade K, Ford CS, Guthrie C, Weis K. (1997) Exportin 1 (Crm1p) is an essential nuclear export factor. *Cell* **90**: 1041-1050

Wimmer, C., Doye, V., Grandi, P., Nehrbass, U., and Hurt, E. (1992). A new subclass of nucleoporins that functionally interacts with nuclear pore protein NSP1. *EMBO J.*, **11**: 5051–5061.

## **Legend to Supplementary Figure**

### **Figure S1. Ribosomal S-proteins are specifically associated with Rli1.**

TAP-purifications of Rli1 (lane 1) and Ret2 (lane 2) were performed under low-salt conditions (50 mM NaCl) as described in Fig. 6B. Ret2 is member of the coatomer (COPI) complex participating in the secretory pathway (Hosobuchi et al., 1992).

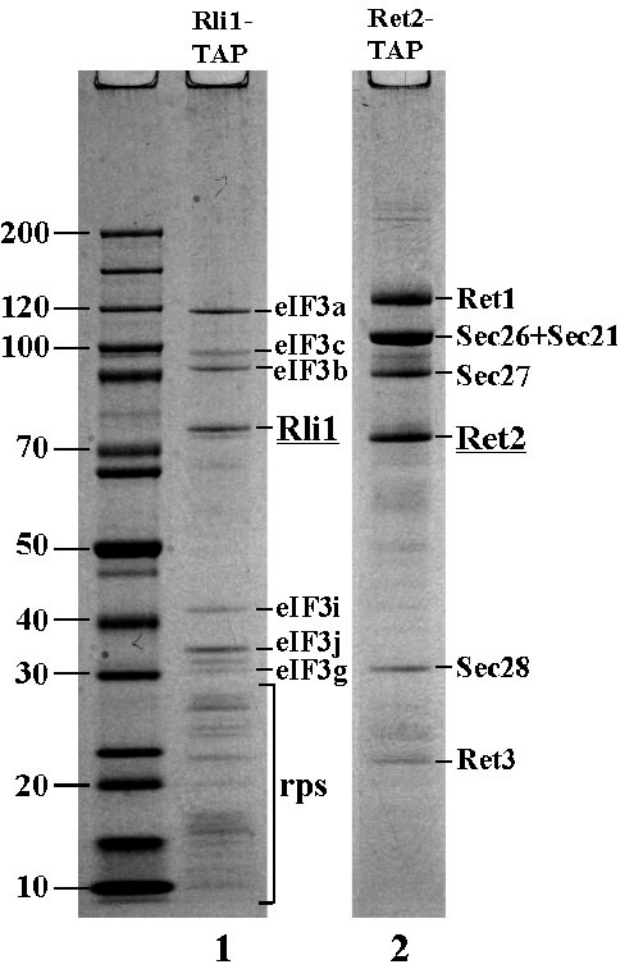

**Supplementary Figure 1**

**(Yarunin et al., 2004)**
